# Supplementary material
Source: HighWire-hosted journal article supplement (https://www.annfammed.org/highwire/filestream/8211/field_highwire_adjunct_files/0/Vinson_Suppl_App.pdf)
Supplement: Vinson_Suppl_App.pdf [file Vinson_Suppl_App.pdf]

# ANNALS OF FAMILY MEDICINE

## Online Supplementary Material

Vinson DC, Turner BJ, Manning BK, Galliher JM. Clinician suspicion of an alcohol problem: an observational study from the AAFP National Research Network. *Ann Fam Med*. 2012;11(1):53-59.

<http://www.annfammed.org/content/11/1/53/DC1>

| <b>Supplemental Appendix. Scoring Key for the Alcohol Use Disorders Identification Test-Consumption (AUDIT-C)</b> |               |
|-------------------------------------------------------------------------------------------------------------------|---------------|
| <b>Question</b>                                                                                                   | <b>Points</b> |
| 1. How often do you have a drink containing alcohol                                                               |               |
| Never                                                                                                             | 0             |
| Monthly or less                                                                                                   | 1             |
| 2 to 4 times a month                                                                                              | 2             |
| 2 to 3 times a week                                                                                               | 3             |
| 4 or more times a week                                                                                            | 4             |
| 2. How many drinks containing alcohol do you have on a typical day when you are drinking?                         |               |
| I don't drink                                                                                                     | 0             |
| 1 or 2                                                                                                            | 0             |
| 3 or 4                                                                                                            | 1             |
| 5 or 6                                                                                                            | 2             |
| 7 to 9                                                                                                            | 3             |
| 10 or more                                                                                                        | 4             |
| 3. How often do you have 6 or more drinks on 1 occasion?                                                          |               |
| Never                                                                                                             | 0             |
| Less than monthly                                                                                                 | 1             |
| Monthly                                                                                                           | 2             |
| Weekly                                                                                                            | 3             |
| Daily or almost daily                                                                                             | 4             |

Note: AUDIT-C score is the sum of the scores from the 3 questions.
